# Supplementary material for: Autophagy and formation of tubulovesicular autophagosomes provide a barrier against nonviral gene delivery
Source: PubMed Central journal article supplement — Autophagy. 2013 Feb 19;9(5):667–82. doi: 10.4161/auto.23877 (PMC3669178; doi:10.4161/auto.23877), 2013-02-19
Supplement: auto-9-667-s01.pdf [file auto-9-667-s01.pdf]

**Supplemental Video 1**

Figure 2A Supplemental Video

CHO cells expressing GFP-LC3 incubated in nutrient media containing cationic lipoplex (22-51 minute incubation)

**Supplemental Video 2**

Figure 2B Supplemental Video

CHO cells expressing GFP-LC3 incubated in nutrient media containing cationic lipoplex (120-185 minute incubation)

**Supplemental Video 3**

Figure 2C Supplemental Video

CHO cells expressing GFP-LC3 incubated in nutrient media containing cationic lipoplex imaged in the presence of 20 µg/ml cycloheximide.

**Supplemental Video 4**

Figure 7A Supplemental Video

LAMP1-RFP was expressed transiently in CHO-cells expressing GFP-LC3. Cells were incubated with lipoplex and TVAs were tracked over 7 minutes.
